# Supplementary material for: Global transcriptional regulation of STAT3- and MYC-mediated sepsis-induced ARDS
Source: PubMed Central journal article supplement — Ther Adv Respir Dis. 2019 Sep 30;13:1753466619879840. doi: 10.1177/1753466619879840 (PMC6769203; doi:10.1177/1753466619879840), 2019-09-30
Supplement: Author_response_to_reviewers_comments_v.2_.pdf [file Author_response_to_reviewers_comments_v.2_.pdf]

## Author response to reviewers comments v.2

Reviewer: 1

Comments to the Author

1. This paper focused on sepsis-induced ARDS, what about other ARDS?

Thanks for this comment. In the GSE32707, the data just focused on sepsis-induced ARDS and there was no data of other ARDS. Thus, we only focus on exploring the underlying molecular mechanisms of sepsis-induced ARDS in this study. Regarding this limitation, we also added the corresponding contents in the discussion as a notable limitation in last revision manuscript. Owing to sepsis is one common cause for ARDS, there are other diseases that can also cause ARDS, our team will investigate ARDS induced by other causes in future studies.
