# Supplementary material for: Global transcriptional regulation of STAT3- and MYC-mediated sepsis-induced ARDS
Source: PubMed Central journal article supplement — Ther Adv Respir Dis. 2019 Sep 30;13:1753466619879840. doi: 10.1177/1753466619879840 (PMC6769203; doi:10.1177/1753466619879840), 2019-09-30
Supplement: Reviewer_1_v.1.pdf [file Reviewer_1_v.1.pdf]

Reviewer 1 v.1

Comments to the Author

1. Proof reading is needed to correct grammar and scientific writing, such as the department of the Corresponding authors and so on.

2. This paper focused on sepsis-induced ARDS, what about other ARDS?
