# Supplementary material for: Global transcriptional regulation of STAT3- and MYC-mediated sepsis-induced ARDS
Source: PubMed Central journal article supplement — Ther Adv Respir Dis. 2019 Sep 30;13:1753466619879840. doi: 10.1177/1753466619879840 (PMC6769203; doi:10.1177/1753466619879840), 2019-09-30
Supplement: Reviewer_1_v.2.pdf [file Reviewer_1_v.2.pdf]

Reviewer 1 v.2

Comments to the Author

The author need to answer the question:This paper focused on sepsis-induced ARDS, what about other ARDS?
